# Supplementary material
Source: PubMed Central journal article supplement (PMC3278754)
Supplement: supp_btr675_youting_BPDA2d_supp.pdf [file supp_btr675_youting_BPDA2d_supp.pdf]

# Supplementary file for “BPDA2d — A 2D global optimization based Bayesian peptide detection algorithm for LC-MS”

Youting Sun<sup>1</sup>, Jianqiu Zhang<sup>\*2</sup>, Ulisses Braga-Neto<sup>1</sup> and Edward R. Dougherty<sup>\*1,3,4</sup>

<sup>1</sup>Department of Electrical and Computer Engineering, Texas A&M University, College Station, TX 77843, USA

<sup>2</sup>Department of Electrical and Computer Engineering, University of Texas at San Antonio, San Antonio, TX 78249, USA

<sup>3</sup>Computational Biology Division, Translational Genomics Research Institution, Phoenix, AZ 85004, USA

<sup>4</sup>Department of Bioinformatics and Computational Biology, University of Texas M.D. Anderson Cancer Center, Houston, TX 77030, USA

Email: Youting Sun - charonsun@tamu.edu; Jianqiu Zhang\* - Michelle.Zhang@utsa.edu; Ulisses Braga-Neto - ulisses@ece.tamu.edu; Edward R. Dougherty\* - edward@ece.tamu.edu;

\*Corresponding author

## Bayesian peptide detection

Let  $\theta \triangleq \{\lambda_k, c_{k,ij}; k = 1, \dots, N, i = 1, \dots, cs, j = 0, \dots, iso\}$  be the set of unknown model parameters.

Given the observed denoised spectra  $\mathbf{y}$ , we apply Gibbs sampling [1] to determine the value of  $\theta$ . Gibbs sampling uses the popular strategy of divide-and-conquer to sample a subset of parameters at a time while fixing the rest at the sample values from the previous iteration, as if they were true. In other words, for the  $l$ -th parameter group  $\theta_l$ , we sample from the conditional posterior distribution  $P(\theta_l | \theta_{-l}, \mathbf{y})$ , where  $\theta_{-l} \triangleq \theta \setminus \theta_l$ , with values obtained from the previous iteration. After this sampling process iterates among the parameter groups for a sufficient number of cycles (i.e., the “burn-in” period), convergence is reached. The samples collected afterwards are shown to be from the marginal posterior distribution  $P(\theta_l | \mathbf{y})$  which is independent of  $\theta_{-l}$ , and thus these samples can be used to estimate the target parameters.

The Gibbs sampling process for the  $k$ th peptide candidate and the derivations of the conditional posterior distributions of model parameters are given below.

- **Sample the apex vector  $\mathbf{c}_k \triangleq [c_{k,ij}; i = 1, \dots, cs, j = 0, \dots, iso]^T$  for the  $k$ th candidate**

By the Bayesian principle, the conditional posterior distribution of  $\mathbf{c}_k$  is proportional to the likelihood times the prior, that is,

$$P(\mathbf{c}_k | \mathbf{y}, \theta_{-\mathbf{c}_k}) \propto P(\mathbf{y} | \theta) \text{Prior}(\mathbf{c}_k), \quad (1)$$

where  $\theta_{-\mathbf{c}_k} \triangleq \theta \setminus \mathbf{c}_k$ .

It is easy to show the likelihood satisfies

$$P(\mathbf{y}|\theta) \propto \exp\left\{-\frac{1}{2}(\mathbf{y} - \mathbf{G}\lambda^{(0)} - \lambda_k \mathbf{g}_k)^T \boldsymbol{\Sigma}_{\mathbf{e}}^{-1}(\mathbf{y} - \mathbf{G}\lambda^{(0)} - \lambda_k \mathbf{g}_k)\right\}, \quad (2)$$

where

$$\mathbf{y} = [y(x_1, 1), y(x_1, 2), \dots, y(x_1, T), y(x_2, 1), y(x_2, 2), \dots, y(x_2, T), \dots, y(x_M, 1), y(x_M, 2), \dots, y(x_M, T)]^T \quad (3)$$

is the observed denoised spectra vector.

$$\lambda^{(q)} \triangleq [\lambda_1, \dots, \lambda_k = q, \dots, \lambda_N]^T, \quad q \in \{0, 1\}, \quad (4)$$

is an indicator vector for peptide existence.

$$\boldsymbol{\Sigma}_{\mathbf{e}} = \text{diag}([\sigma_1^2, \dots, \sigma_T^2; \sigma_1^2, \dots, \sigma_T^2; \dots; \sigma_1^2, \dots, \sigma_T^2]_{1 \times MT}), \quad (5)$$

with  $\sigma_t^2$  being the variance of the  $t$ -th spectrum.

$$\mathbf{G} = (\mathbf{g}_1, \mathbf{g}_2, \dots, \mathbf{g}_N), \quad (6)$$

whose  $k$ -th column is given by

$$\mathbf{g}_k = [g_k(x_1, 1), g_k(x_1, 2), \dots, g_k(x_1, T), g_k(x_2, 1), g_k(x_2, 2), \dots, g_k(x_2, T), \dots, g_k(x_M, 1), g_k(x_M, 2), \dots, g_k(x_M, T)]^T, \quad (7)$$

which is a  $MT \times 1$  vector with the entry  $g_k(x_m, t) = \sum_{i=1}^{cs} \sum_{j=0}^{iso} c_{k,ij} l_k(t) I_{x_m=\alpha_{k,ij}}$ ,  $m = 1, 2, \dots, M$ ,  $t = 1, 2, \dots, T$ , representing the signal at  $(x_m, t)$  generated by peptide candidate  $k$ .

The heights of the isotopic peaks of peptide candidate  $k$  at charge state  $i$  follow a multinomial distribution [2], which by the Central Limit Theorem can be approximated by a Gaussian distribution as below:

$$P(c_{k,ij}, j = 0, \dots, iso | a_k, \eta_{k,i}, \pi_k) = MN(a_k \eta_{k,i}, \pi_k) \quad (8)$$

$$\approx N(a_k \eta_{k,i} \pi_k, a_k \eta_{k,i} [\text{diag}(\pi_k) - \pi_k^T \pi_k]), \quad (9)$$

where  $a_k$  is the total apex intensity of candidate  $k$ ,  $\eta_k \triangleq [\eta_{k,1}, \eta_{k,2}, \dots, \eta_{k,cs}]^T$  denotes the candidate's charge state distribution, and  $\pi_k \triangleq [\pi_{k,0}, \pi_{k,1}, \dots, \pi_{k,iso}]^T$  is the theoretical isotopic distribution estimated by the Averagine approach [3, 4].

Thus the prior distribution of the peak height vector  $\mathbf{c}_k$  is given by:

$$\text{Prior}(\mathbf{c}_k) = P(\mathbf{c}_k | a_k, \eta_k, \pi_k) \approx N(\mu_{\mathbf{c}_k}, \Sigma_{\mathbf{c}_k}), \quad (10)$$

where

$$\mu_{\mathbf{c}_k} = [a_k \eta_{k,1} \pi_k^T, a_k \eta_{k,2} \pi_k^T, \dots, a_k \eta_{k,cs} \pi_k^T]^T, \quad (11)$$

$$\Sigma_{\mathbf{c}_k} = \text{diag}(\Sigma_i), \quad (12)$$

with

$$\Sigma_i = a_k \eta_{k,i} [\text{diag}(\pi_k) - \pi_k^T \pi_k], \quad i = 1, 2, \dots, cs. \quad (13)$$

Substituting Eq. 2 and Eq. 10 into Eq. 1 and it can be shown by algebraic manipulations [5] that the conditional posterior distribution of  $\mathbf{c}_k$  is also Gaussian, with the mean vector and covariance matrix given below:

$$\Sigma_{\mathbf{c}_k | \mathbf{y}, \theta - \mathbf{c}_k} = (\mathbf{I} - \mathbf{K} \mathbf{H}_k) \Sigma_{\mathbf{c}_k}, \quad (14)$$

$$\mu_{\mathbf{c}_k | \mathbf{y}, \theta - \mathbf{c}_k} = \mu_{\mathbf{c}_k} + \mathbf{K}(\mathbf{y} - \mathbf{G} \lambda^{(0)} - \mathbf{H}_k \mu_{\mathbf{c}_k}), \quad (15)$$

where  $\mathbf{H}_k = [h_{ms, (i-1) \times (iso+1) + j + 1}]_{MT \times cs(iso+1)}$  is the elution profile matrix of candidate  $k$ . The  $[(i-1) \times (iso+1) + j + 1]$ th column contains the normalized elution profile of candidate  $k$  at charge state  $i$  and isotopic number  $j$  which has been estimated in preprocessing steps. And

$\mathbf{K} \triangleq \Sigma_{\mathbf{c}_k} \mathbf{H}_k^T (\mathbf{H}_k \Sigma_{\mathbf{c}_k} \mathbf{H}_k^T + \Sigma_e)^{-1}$  is known as the Kalman gain matrix [6].

Note that the matrices involved in the above equations have huge dimensions which make the calculation almost infeasible. Thus, to update each peptide's signal, the related matrices  $\mathbf{K}$ ,  $\mathbf{G}$ ,  $\mathbf{H}$ ,  $\mathbf{y}$  and  $\Sigma_e$  are restricted to the corresponding peptide signal regions. This does no harm to the calculation accuracy while dramatically increases the speed.

- **Sample  $a_k$ , the total apex intensity of candidate  $k$**

The conditional distribution of  $a_k$  takes different forms for different values of  $\lambda_k$ .

When  $\lambda_k = 1$  (the  $k$ th candidate is inferred to be present), by definition,

$$a_k | (c_{k,ij}, \lambda_k = 1) = \sum_{i=1}^{cs} \sum_{j=0}^{iso} c_{k,ij} \cdot I_{c_{k,ij} > 0}. \quad (16)$$

When  $\lambda_k = 0$  (the  $k$ th candidate is inferred to be absent), the distribution of  $a_k$ , which is independent of the observation  $\mathbf{c}_k$ , is modeled by a uniform distribution as below:

$$P(a_k | c_{k,ij}, \lambda_k = 0) = \text{Unif}(0, u_k), \quad (17)$$

where  $u_k$  is the upper bound of  $a_k$ .

- **Sample  $\eta_k \triangleq [\eta_{k,1}, \eta_{k,2}, \dots, \eta_{k,cs}]^T$ , the charge state distribution of candidate  $k$**

Unlike the isotopic distribution, the charge state distribution cannot be theoretically predicted even when the peptide sequence is given. Thus  $\eta_k$  needs to be estimated by the Gibbs sampling process.

Let  $\mathbf{b}_k \triangleq [b_{k,1}, b_{k,2}, \dots, b_{k,cs}]^T$ , where  $b_{k,i}$  is the total apex abundance of peptide  $k$  at charge state  $i$ . Given the charge state distribution and the total apex abundance of peptide  $k$ , the likelihood of  $\mathbf{b}_k$  is multinomial:

$$P(\mathbf{b}_k | \eta_k, a_k) = \text{MN}(a_k, \eta_k). \quad (18)$$

As is well known, the conjugate prior to a multinomial likelihood is Dirichlet, which is also a reasonable choice for the prior of  $\eta_k$ . Thus, let the prior of  $\eta_k$  be a Dirichlet distribution with parameter  $w\alpha$ , where  $w$  is a weight parameter that controls the strength of the prior information. A small  $w$  is preferable if uncertainty resides in the prior, and vice versa. Then the posterior distribution of  $\eta_k$  is given by

$$P(\eta_k | \mathbf{b}_k) \propto P(\mathbf{b}_k | \eta_k) \text{Prior}(\eta_k) \quad (19)$$

$$= \text{Dirichlet}(w\alpha + \mathbf{b}_k). \quad (20)$$

- **Sample the peptide existence indicator variable  $\lambda_k$**

The conditional posterior distribution of  $\lambda_k$  is given by

$$\begin{aligned} P(\lambda_k | \mathbf{y}, \theta_{-\lambda_k}) &\propto P(\mathbf{y} | \theta) \text{Prior}(\lambda_k) \\ &\propto \exp \left\{ -\frac{1}{2} (\mathbf{y} - \mathbf{G}\lambda)^T \Sigma_e^{-1} (\mathbf{y} - \mathbf{G}\lambda) \right\} \text{Prior}(\lambda_k), \end{aligned} \quad (21)$$

where  $\mathbf{G}$  is defined in Eq. 6.

The log-likelihood ratio (LLR) of  $\lambda_k$  can be calculated as below

$$\begin{aligned} LLR_{\lambda_k} &= \ln \frac{P(\lambda_k = 1 | \mathbf{y}, \theta_{-\lambda_k})}{P(\lambda_k = 0 | \mathbf{y}, \theta_{-\lambda_k})} \\ &= -\frac{1}{2} \left[ (\mathbf{y} - \mathbf{G}\lambda^{(1)})^T \Sigma_e^{-1} (\mathbf{y} - \mathbf{G}\lambda^{(1)}) - (\mathbf{y} - \mathbf{G}\lambda^{(0)})^T \Sigma_e^{-1} (\mathbf{y} - \mathbf{G}\lambda^{(0)}) \right] + \ln \frac{P(\lambda_k = 1)}{P(\lambda_k = 0)}, \end{aligned} \quad (22)$$

where  $\lambda^{(q)}, q \in \{0, 1\}$  is defined by Eq. 4.

If no prior knowledge is available about which peptide candidates are more likely to be present in the sample, then a reasonable choice for the prior of  $\lambda_k$  could be the uniform distribution. But we would like to be a bit conservative about the existence of peptide candidates. The idea is that by adding more candidates, it is possible to reduce the mean squared error (MSE) between the inferred spectra and the observed denoised spectra, but at the same time the chances of overfitting increases as the model becomes more complex. Thus, a prior based on Bayesian information criterion (BIC) [7] is adopted to resolve the problem by introducing a penalty term for the number of parameters of the model. And the above equation can be rewritten as:

$$LLR_{\lambda_k} = -\frac{1}{2} \left[ (\mathbf{y} - \mathbf{G}\lambda^{(1)})^T \Sigma_e^{-1} (\mathbf{y} - \mathbf{G}\lambda^{(1)}) - (\mathbf{y} - \mathbf{G}\lambda^{(0)})^T \Sigma_e^{-1} (\mathbf{y} - \mathbf{G}\lambda^{(0)}) \right] - \frac{\ln(MT)}{2} \Delta, \quad (23)$$

where  $\Delta = Card(\theta) - Card(\theta_{-\lambda_k, -c_k}) = Card(\mathbf{c}_k)$  is the difference between the number of free parameters of the two models – with and without candidate  $k$ , respectively.

The conditional posterior distribution of  $\lambda_k$  is then obtained based on the log-likelihood ratio as follows:

$$P(\lambda_k = 1 | \mathbf{y}, \theta_{-\lambda_k}) = \frac{1}{1 + e^{-LLR_{\lambda_k}}}, \quad (24)$$

$$P(\lambda_k = 0 | \mathbf{y}, \theta_{-\lambda_k}) = 1 - P(\lambda_k = 1 | \mathbf{y}, \theta_{-\lambda_k}). \quad (25)$$

The pseudocode of the Gibbs sampling process is given in Table 1.

Table 1: The Gibbs sampling process

- 
1. Cluster candidates into  $S$  clusters.
  2. Sort clusters by their importance in descending order.
  3. For iteration  $r = 1$  to  $R$
  4. For cluster  $s = 1$  to  $S$
  5. For peptide candidate  $k = i_1^s$  to  $i_{N_s}^s$
  6. Draw  $\mathbf{c}_k^r$  based on its conditional posterior distribution.
  7. end of  $k$  loop
  8. Draw  $\lambda_k^r, k = 1 \dots, i_{N_s}^s$  for the cluster according to the joint conditional posterior distribution.
  9. end of  $s$  loop
  10. end of  $r$  loop
-

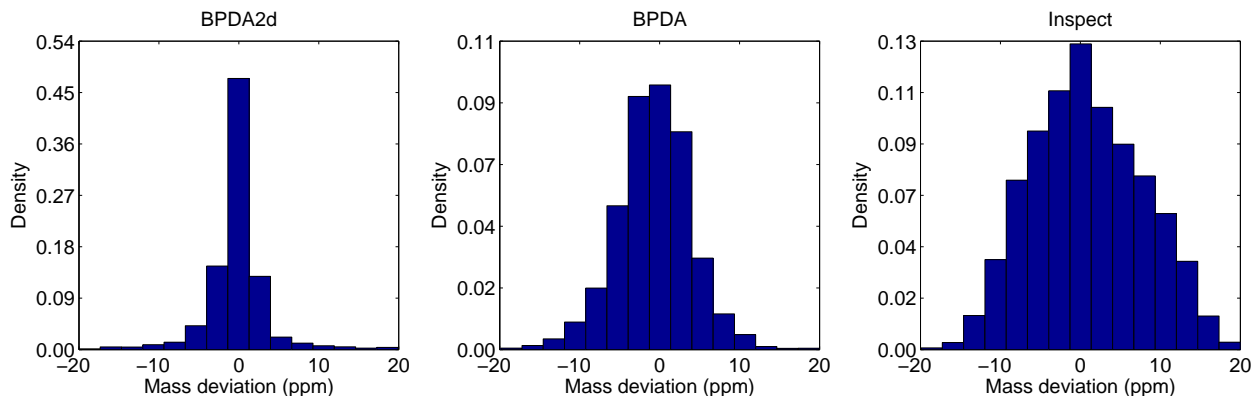

Figure 1: Mass deviation of reported features that can be matched to the ground truth peptide list using a 20 ppm mass window (along with other criteria imposed on the retention time as mentioned in the paper). Each panel represents a detection algorithm as suggested by the subtitle. The plot was obtained by normalizing the mass deviation histogram by the total number of true peptides. It can be seen that BPDA2d has a much higher mass accuracy than the other two algorithms: the density around 0 ppm given by BPDA2d increased by around 4 times compared to BPDA and msInspect; and the SD of mass deviation is 3.7, 4.6, and 6.9 ppm for BPDA2d, BPDA and msInspect, respectively.

Table 2: Statistics of detection results

|           | TP | FP | TN  | FN | $ACC^1$ | $SPC^2$ |
|-----------|----|----|-----|----|---------|---------|
| BPDA2d    | 16 | 16 | 102 | 0  | 0.88    | 0.86    |
| BPDA      | 15 | 58 | 207 | 1  | 0.79    | 0.78    |
| msInspect | 12 | 4  | 1   | 4  | 0.62    | 0.2     |

$$^1 \text{ Accuracy: } ACC \triangleq \frac{TP+TN}{P+N}$$

$$^2 \text{ Specificity: } SPC \triangleq \frac{TN}{FP+TN}$$

## Supplementary results

Figure 1: Mass accuracy of different algorithms in the 100-mix LC-MS data sets

Table 2: Synthetic LC-MS data set with 8 pairs of overlapping peptides

Table 3: Running time on test datasets

## References

1. Geman S, Geman D: **Stochastic relaxation, Gibbs distributions, and the Bayesian restoration of images.** *IEEE Trans. Pattern Anal. Mach. Intell.* 1984, **6**:721–741.
2. Kaur P, O’Connor PB: **Use of statistical methods for estimation of total number of charges in a mass spectrometry experiment.** *Analytical Chemistry* 2004, **76**:2756–2762.
3. Senko MW, Beu SC, McLafferty FW: **Determination of monoisotopic masses and ion populations for large biomolecules from resolved isotopic distributions.** *J Am Soc Mass Spectrom* 1995, **6**:229–233.

Table 3: Running time

|           | 100-mix | 16-mix | QTOF LC-MS/MS |
|-----------|---------|--------|---------------|
| BPDA2d    | 35 min  | 4 hr   | 6 hr          |
| BPDA      | 25 min  | 20 min | 2.25 hr       |
| msInspect | 0.5 min | 2 min  | 4 min         |

4. Horn DM, Zubarev RA, McLafferty FW: **Automated reduction and interpretation of high resolution electrospray mass spectra of large molecules.** *Journal of the American Society for Mass Spectrometry* 2000, **11**(4):320–332.
5. Anderson BDO, Moore JB: *Optimal filtering.* Englewood Cliffs, NJ, USA: Prentice-Hall 1979.
6. Burgers G, Leeuwen PJ, Evensen G: **Analysis scheme in the ensemble Kalman filter.** *Monthly Weather Review* 1998, **126**:1719–1724.
7. Schwarz G: **Estimating the dimension of a model.** *Ann. Stat.* 1978, **6**:461–464.
